# Supplementary material
Source: Springer Nature journal article supplement (https://www.springermedizin.de/resource/supplementary/12876_2011_681_MOESM2_ESM.pdf/9437192)
Supplement: MOESM2 [file 9437192]

# Aldrete score:

|                                                     |   |
|-----------------------------------------------------|---|
| » Motoric activity                                  |   |
| • Spontaneous movement when addressed               | 2 |
| • Weak spontaneous movements when addressed         | 1 |
| • No movement                                       | 0 |
| » Breathing                                         |   |
| • Coughs on comment or cries                        | 2 |
| • Keeps the airway open                             | 1 |
| • Obstructed airways                                | 0 |
| » Blood pressure compared to reference measurement* |   |
| • $\Delta < 20$ mm Hg                               | 2 |
| • $\Delta = 20 - 50$ mm Hg                          | 1 |
| • $\Delta > 50$ mm Hg                               | 0 |
| » Consciousness                                     |   |
| • Awake                                             | 2 |
| • Response to stimulus, reflexes intact             | 1 |
| • No answer, reflexes absent                        | 0 |
| » Oxygen saturation                                 |   |
| • 100 - 98 %                                        | 2 |
| • 97 - 95 %                                         | 1 |
| • $< 95$ %                                          | 0 |

\*Reference measurement is performed 1½ minutes after administration of the spasmolytic agent.
